# Supplementary material for: Complex implementation mechanisms in primary care: do physicians’ beliefs about the effectiveness of innovation play a mediating role? Applying a realist inquiry and structural equation modeling approach in a formative evaluation study
Source: Springer Nature journal article supplement (doi:10.1186/s12875-023-02081-x), 2023-06-27

# Additional File 1. Flow diagram of the study

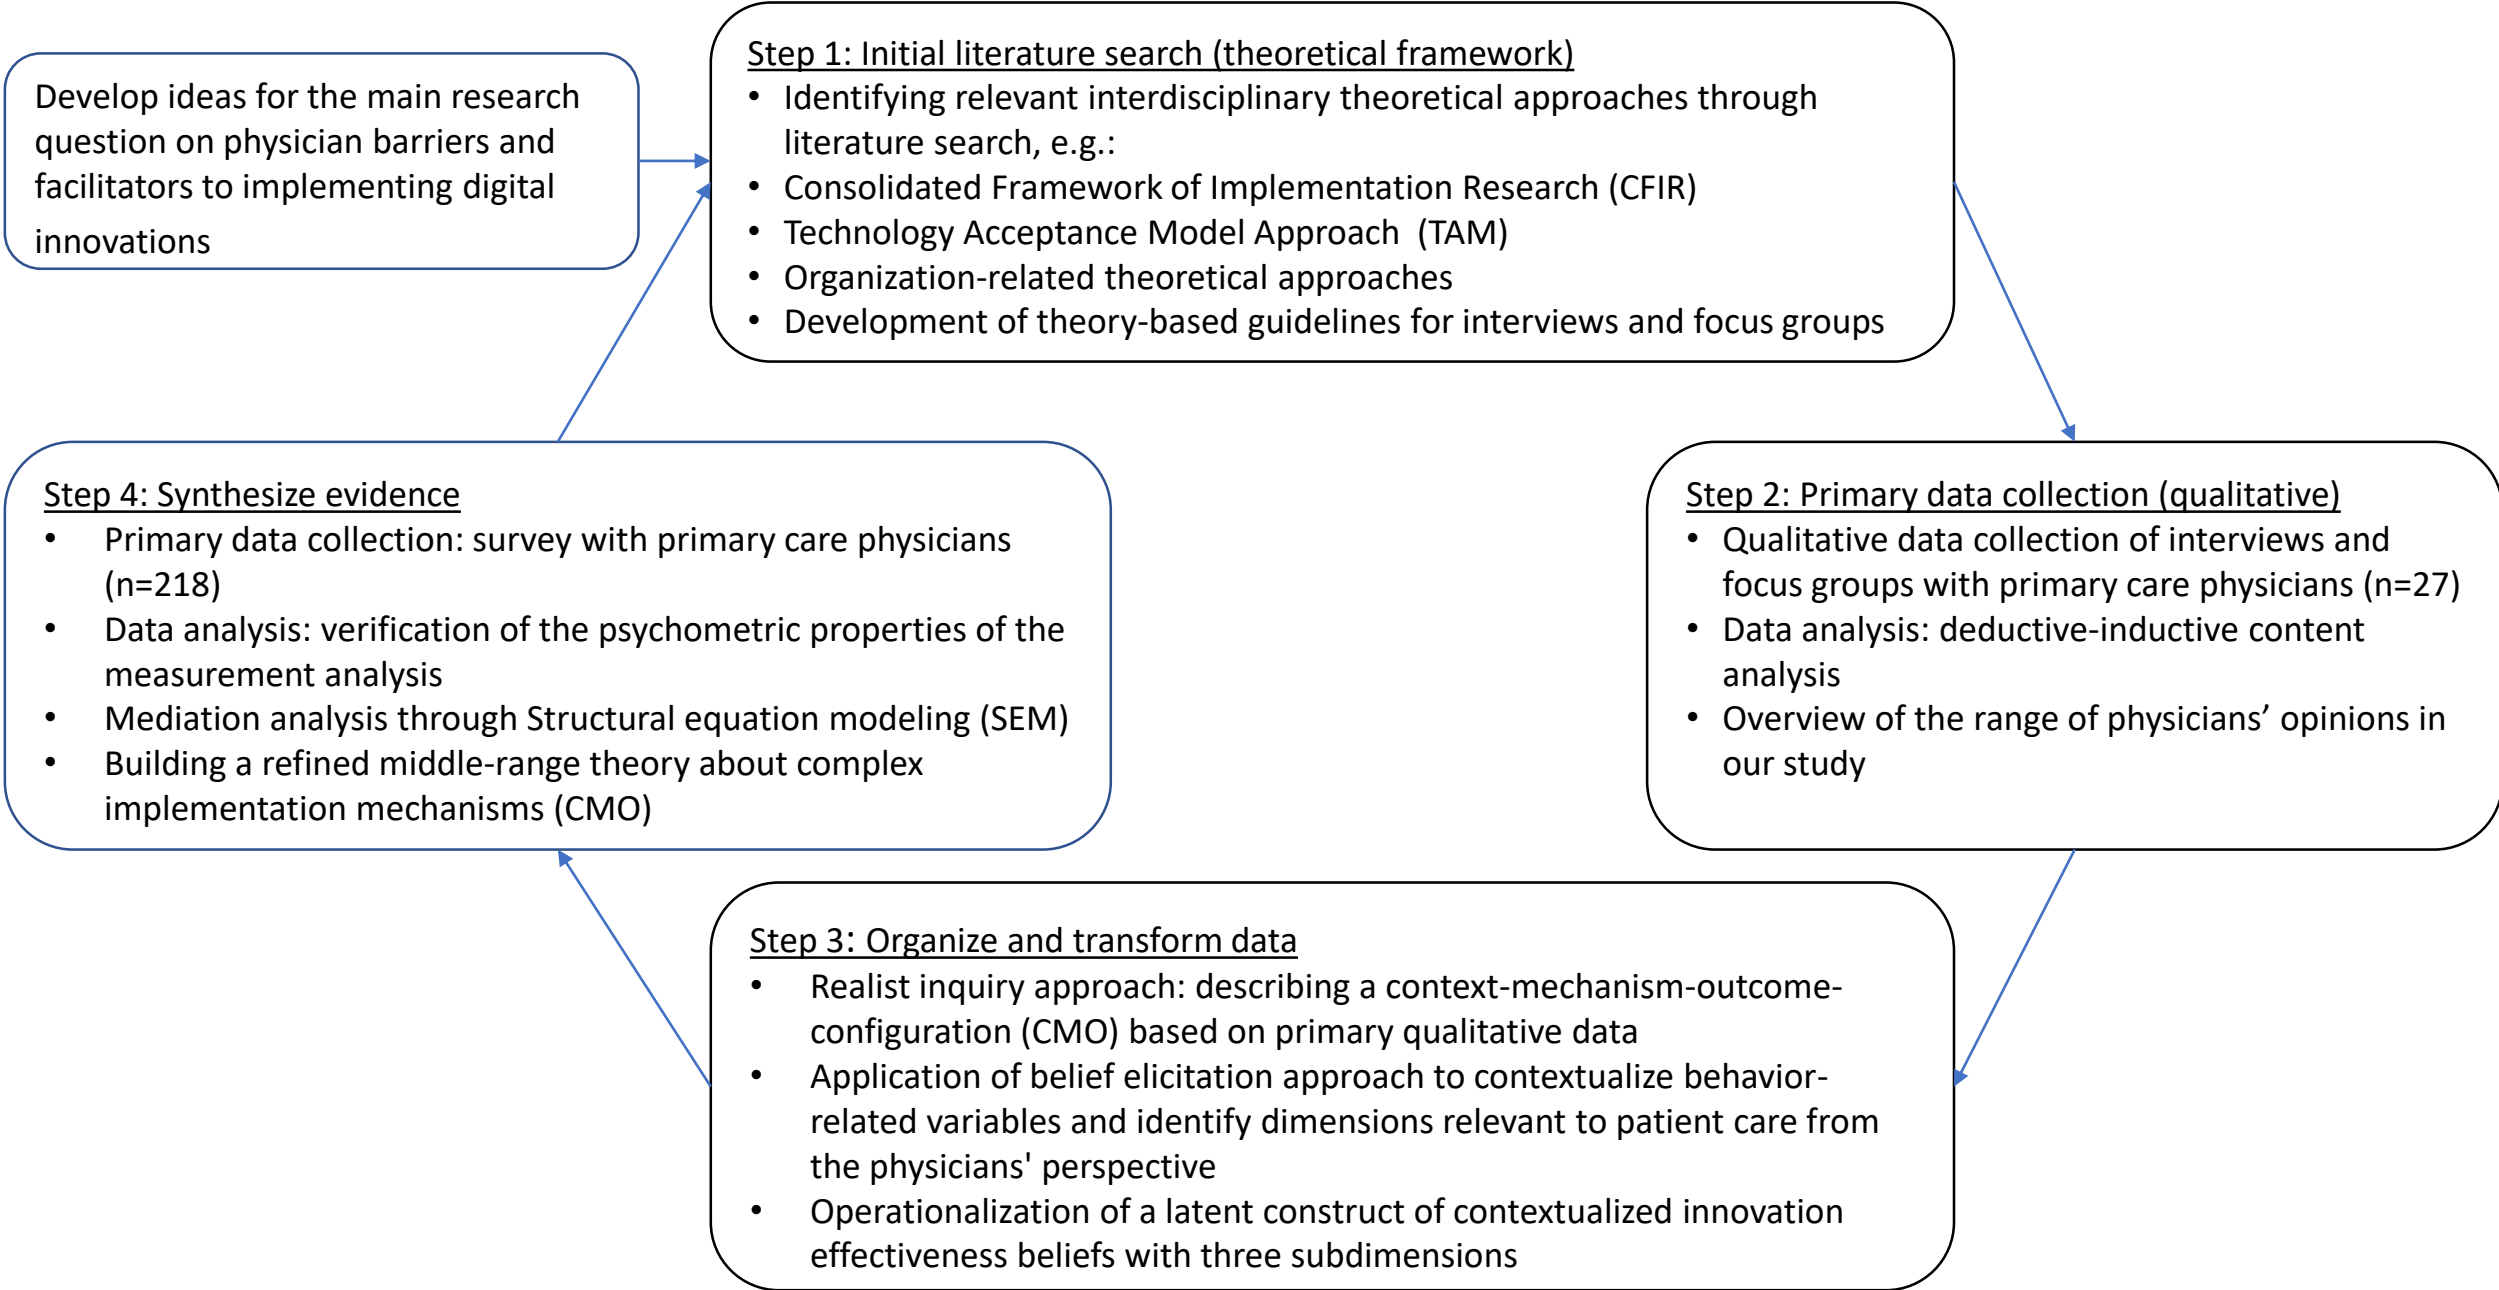

Supplement: MOESM1 [file 25542596]
