# Supplementary material for: Complex implementation mechanisms in primary care: do physicians’ beliefs about the effectiveness of innovation play a mediating role? Applying a realist inquiry and structural equation modeling approach in a formative evaluation study
Source: Springer Nature journal article supplement (doi:10.1186/s12875-023-02081-x), 2023-06-27
Supplement: MOESM4 [file 25542596]

Additional File 4

**Contextualized innovation effectiveness beliefs scale (CB)**

| Item no. |                                                                                                                                                                                    | Dimension                  |
|----------|------------------------------------------------------------------------------------------------------------------------------------------------------------------------------------|----------------------------|
| 1        | I think using the [name of digital innovation] has made me more aware of the risks of polypharmacy.                                                                                |                            |
| 2        | I think that by using [name of digital innovation], I will be able to transfer my newly acquired knowledge about polypharmacy to other patients in this primary care organization. | <i>Prescription Safety</i> |
|          | What information about your polypharmacy patients provided by [digital innovation name] has been most helpful to you in patient care?                                              | <i>Information Quality</i> |
| 3        | a. Risk analysis information                                                                                                                                                       |                            |
| 4        | b. Side effect analysis information                                                                                                                                                |                            |
| 5        | Using [name of digital innovation] in our primary care organization improves communication with my polypharmacy patients.                                                          |                            |
| 6        | By using [name of digital innovation] in our primary care organization, I can better explain to my polypharmacy patients why their medications should be discontinued or switched. | <i>Communication</i>       |

Note: For all measures, physicians were able to respond to items on a five-point Likert scale.
