# Supplementary material for: Complex implementation mechanisms in primary care: do physicians’ beliefs about the effectiveness of innovation play a mediating role? Applying a realist inquiry and structural equation modeling approach in a formative evaluation study
Source: Springer Nature journal article supplement (doi:10.1186/s12875-023-02081-x), 2023-06-27
Supplement: MOESM5 [file 25542596]

### **Additional File 5. Construct reliability of measuring instruments**

| Constructs                                              | Mean (SD)   | AVE   | CR    | Items | Factor Loading |
|---------------------------------------------------------|-------------|-------|-------|-------|----------------|
| Organizational Readiness for Implementing Change (ORIC) | 3.17 (1.03) | 0.759 | 0.967 | ORIC1 | .790           |
|                                                         |             |       |       | ORIC2 | .828           |
|                                                         |             |       |       | ORIC3 | .854           |
|                                                         |             |       |       | ORIC4 | .874           |
|                                                         |             |       |       | ORIC5 | .870           |
|                                                         |             |       |       | ORIC6 | .814           |
|                                                         |             |       |       | ORIC7 | .807           |
|                                                         |             |       |       | ORIC8 | .830           |
|                                                         |             |       |       | ORIC9 | .885           |
| Contextualized innovation effectiveness beliefs (CB)    | 3.36 (.94)  | 0.490 | 0.842 | CB1   | .545           |
|                                                         |             |       |       | CB2   | .648           |
|                                                         |             |       |       | CB3   | .624           |
|                                                         |             |       |       | CB4   | .614           |
|                                                         |             |       |       | CB5   | .708           |
|                                                         |             |       |       | CB6   | .757           |
| Behavioral Intention (BI)/ Adoption                     | 2.43 (.91)  | 0.620 | 0.832 | BI1   | .808           |
|                                                         |             |       |       | BI2   | .809           |
|                                                         |             |       |       | BI3   | .741           |

For all measures physicians could respond items on a five-point Likert scale from 1 (strongly disagree) to 5 (strongly agree).
