# Supplementary material for: Complex implementation mechanisms in primary care: do physicians’ beliefs about the effectiveness of innovation play a mediating role? Applying a realist inquiry and structural equation modeling approach in a formative evaluation study
Source: Springer Nature journal article supplement (doi:10.1186/s12875-023-02081-x), 2023-06-27
Supplement: MOESM6 [file 25542596]

**AdAM Study Group**

Petra Kellermann-Mühlhoff<sup>4</sup>, (AdAM Study Group representative; [Petra.Kellermann-Muehlhoff@barmer.de](mailto:Petra.Kellermann-Muehlhoff@barmer.de)), Lara Düvel<sup>4</sup>, Till Beckmann<sup>4</sup>, Reinhard Hammerschmidt<sup>5</sup>, Julia Jachmich<sup>5</sup>, Eva Leicher<sup>5</sup>, Benjamin Brandt<sup>5</sup>, Johanna Richard<sup>5</sup>, Frank Meyer<sup>5</sup>, Dr. Mathias Flume<sup>5</sup>, Thomas Müller<sup>5</sup>, Prof Dr. Ferdinand M. Gerlach<sup>6</sup>, Prof. Dr. Christiane Muth<sup>6</sup>, Dr. Ana Isabel Gonzalez-Gonzalez<sup>6</sup>, Kiran Chapidi<sup>6</sup>, Robin Brünn<sup>6</sup>, Peter Ihle<sup>7</sup>, Ingo Meyer<sup>7</sup>, Prof. Dr. Nina Timmesfeld<sup>8</sup>, Prof. Dr. Hans J. Trampisch<sup>8</sup>, Renate Klaaßen-Mielke<sup>8</sup>, Jale Basten<sup>8</sup>, Prof. Dr. Wolfgang Greiner<sup>9</sup>, Bastian Suhrmann<sup>9</sup>, Alexandra Piotrowski<sup>10</sup>, Karolina Beifus<sup>10</sup>, Sarah Meyer<sup>10</sup>, Prof. Dr. Daniel Grandt<sup>11</sup>, Simone Grandt<sup>12</sup>

<sup>4</sup> BARMER, Statutory Health Insurance, Wuppertal, Germany

<sup>5</sup> KVWL, Association of statutory health insurance physicians Westfalen-Lippe, Dortmund, Germany

<sup>6</sup> Institute of General Practice, Goethe-University, Frankfurt/Main, Germany

<sup>7</sup> PMV research group, Faculty of Medicine and University Hospital Cologne, University of Cologne, Cologne, Germany

<sup>8</sup> Department of Medical Informatics, Biometry and Epidemiology, Ruhr University, Bochum, Germany

<sup>9</sup> Faculty of Health Science, Department of Health Economics and Health Care Management, Bielefeld University, Bielefeld, Germany

<sup>10</sup> Center for Health Economics and Health Services Research, University of Wuppertal, Germany

<sup>11</sup> Internal Medicine I, at the Clinic Saarbrücken, Germany

<sup>12</sup> RpDoc Solutions GmbH, Saarbrücken, Germany
